# Supplementary material for: iT4SE-EP: Accurate Identification of Bacterial Type IV Secreted Effectors by Exploring Evolutionary Features from Two PSI-BLAST Profiles
Source: MDPI journal article supplement (doi:10.3390/molecules26092487), 2021-04-24
Supplement: s1 [file s1]

**Table S1.** Prediction results of the SVM and RF classifiers based on different features with the cut-off of 0.4.

| Method | Feature              | Acc   | Sen   | Spe   | Pre   | F-score | MCC   | AUC   |
|--------|----------------------|-------|-------|-------|-------|---------|-------|-------|
| SVM    | PSSM_AAC (20D)       | 0.907 | 0.849 | 0.936 | 0.869 | 0.859   | 0.789 | 0.927 |
|        | PSPCP_ACC (1000D)    | 0.827 | 0.714 | 0.883 | 0.754 | 0.734   | 0.606 | 0.868 |
|        | PSFM_DWT (1040D)     | 0.904 | 0.849 | 0.932 | 0.863 | 0.856   | 0.785 | 0.927 |
|        | PSSM_EDT (1600D)     | 0.916 | 0.852 | 0.949 | 0.893 | 0.872   | 0.811 | 0.942 |
|        | All features (3660D) | 0.914 | 0.865 | 0.939 | 0.877 | 0.871   | 0.807 | 0.935 |
| RF     | PSSM_AAC (20D)       | 0.901 | 0.845 | 0.929 | 0.857 | 0.851   | 0.777 | 0.932 |
|        | PSPCP_ACC (1000D)    | 0.781 | 0.695 | 0.824 | 0.664 | 0.679   | 0.514 | 0.833 |
|        | PSFM_DWT (1040D)     | 0.895 | 0.849 | 0.918 | 0.838 | 0.843   | 0.764 | 0.923 |
|        | PSSM_EDT (1600D)     | 0.902 | 0.852 | 0.927 | 0.855 | 0.853   | 0.780 | 0.940 |
|        | All features (3660D) | 0.900 | 0.845 | 0.927 | 0.854 | 0.850   | 0.775 | 0.936 |

**Table S2.** Performance comparison before and after feature selection with the cut-off of 0.4.

| Dataset    | Feature               | Acc   | Sen   | Spe   | Pre   | F-score | MCC   |
|------------|-----------------------|-------|-------|-------|-------|---------|-------|
| Train-915  | All features (3660D)  | 0.914 | 0.865 | 0.939 | 0.877 | 0.871   | 0.807 |
|            | Optimal subset (320D) | 0.918 | 0.852 | 0.950 | 0.896 | 0.873   | 0.813 |
| Train-1502 | All features (3660D)  | 0.953 | 0.892 | 0.974 | 0.925 | 0.908   | 0.877 |
|            | Optimal subset (180D) | 0.946 | 0.874 | 0.971 | 0.914 | 0.893   | 0.858 |
